# Supplementary material
Source: PubMed Central journal article supplement (PMC4608447)
Supplement: NIHMS728624-supplement-supp_tables.pdf [file NIHMS728624-supplement-supp_tables.pdf]

**Appendix**  
**Impact of Contraceptive Counseling in Clinical Settings: A Systematic Review**  
**Zapata et al.**

**Appendix A.** Search terms used in the systematic review

| <b>Concept</b>                | <b>Search terms</b>                                                                                                                                                                                           |
|-------------------------------|---------------------------------------------------------------------------------------------------------------------------------------------------------------------------------------------------------------|
| <b>PubMed search terms</b>    |                                                                                                                                                                                                               |
| Family planning               | “Family Planning Services”[Mesh] OR “Family Planning Policy”[Mesh] OR “Reproductive Health Services”[Mesh] OR “Family Planning” OR (“Title X”) OR (“Planned Parenthood”)                                      |
| Contraception                 | “Contraception”[Mesh] OR “Contraceptive Agents”[Mesh] OR “Contraceptive Devices”[Mesh] OR (“Birth control”) OR “Contraception Behavior”[Mesh]                                                                 |
| Counseling                    | “Counseling”[Mesh]                                                                                                                                                                                            |
| Education                     | “Health Education”[Mesh] OR “Health Education”[All Fields] OR (“Health Educator”)                                                                                                                             |
| <b>PsychINFO search terms</b> |                                                                                                                                                                                                               |
| Family planning               | ( DE "Family Planning" OR DE "Birth Control" OR DE "Family Planning Attitudes" ) or "family planning" or "Planned parenthood" or "title X" or "birth control"                                                 |
| Counseling or education       | ( (DE "Counseling" OR DE "Group Counseling" OR DE "Peer Counseling") OR (DE "Health Education") ) or (behavi* OR "Reproductive life plan" OR education)                                                       |
| <b>CINAHL search terms</b>    |                                                                                                                                                                                                               |
| Family planning               | (MH "Family Planning+") OR family planning OR (MH "Family Planning Policy") OR planned parenthood OR (title x)                                                                                                |
| Contraception                 | ( (MH "Contraception+") OR contraception OR (MH "Contraceptive Agents+") OR (MH "Contraceptive Devices+") OR (MH "Family Planning: Contraception (Iowa NIC)") ) or (birth control)                            |
| Counseling or education       | ( (MH "Counseling+") OR counseling OR (MH "Counseling Service (Saba CCC)+") OR (MH "Sexual Counseling") OR (MH "Reproductive Health") OR (MH "Health Education") ) or (education or "Reproductive life plan") |

**Appendix**  
**Impact of Contraceptive Counseling in Clinical Settings: A Systematic Review**  
**Zapata et al.**

**Appendix B.** Flow chart of study selection.

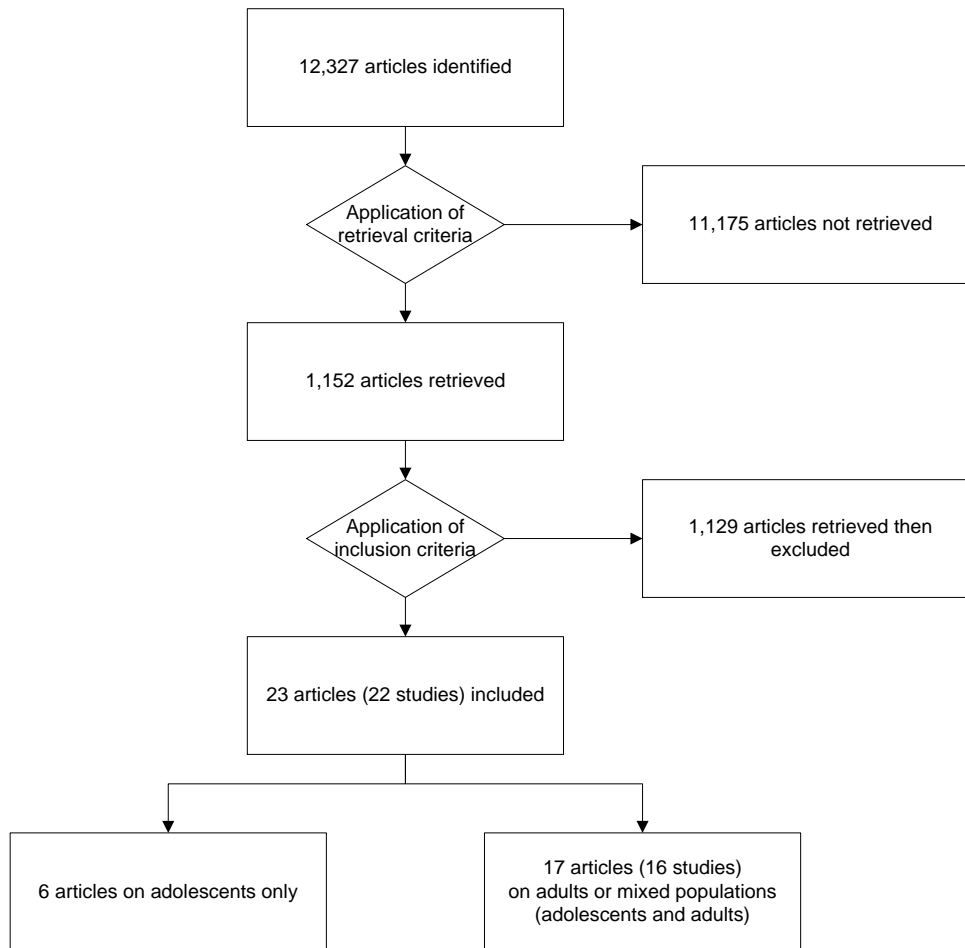

**Appendix**  
**Impact of Contraceptive Counseling in Clinical Settings: A Systematic Review**  
**Zapata et al.**

**Appendix C. Evidence on Impact of Contraceptive Counseling in Clinical Settings**

| Reference/<br>Funding          | Design/Setting                              | Population                                                                                            | Intervention                                                                                                                                                                                                                                                                                                           | Outcomes                                                                                                                                                                                                                      | Results                                                                                                                                                                                                                                                                                | Quality                                                                                                                                                                                                               |
|--------------------------------|---------------------------------------------|-------------------------------------------------------------------------------------------------------|------------------------------------------------------------------------------------------------------------------------------------------------------------------------------------------------------------------------------------------------------------------------------------------------------------------------|-------------------------------------------------------------------------------------------------------------------------------------------------------------------------------------------------------------------------------|----------------------------------------------------------------------------------------------------------------------------------------------------------------------------------------------------------------------------------------------------------------------------------------|-----------------------------------------------------------------------------------------------------------------------------------------------------------------------------------------------------------------------|
| <b>Adolescents</b>             |                                             |                                                                                                       |                                                                                                                                                                                                                                                                                                                        |                                                                                                                                                                                                                               |                                                                                                                                                                                                                                                                                        |                                                                                                                                                                                                                       |
| Berger (1987) <sup>17</sup>    | Pre-post study; 1 study group               | 383 unmarried youth, aged 11–19; 61% female; 73% Hispanic; 45% Medicaid eligible; 35% sexually active | Discussions on establishing sexual values, ability and right to refuse sexual intercourse, abstinence and alternate forms of intimacy, contraceptive methods, and consequences of unprotected sex                                                                                                                      | <u>Medium-term:</u> increase contraceptive use<br><br><u>Other:</u> unintended negative consequences                                                                                                                          | Contraceptive use at last sex among sexually active youth significantly ( $p<0.001$ ) increased from baseline to FU from 22% to 70% for females and from 34% to 85% for males                                                                                                          | Level II-3; high risk for bias<br><br><u>Strengths:</u><br>Staff received training on protocol<br><br><u>Weaknesses:</u><br>Self-report bias                                                                          |
| Funding source not stated      | Urban adolescent clinic, NYC                | Recruitment: NR                                                                                       | Moderate intensity                                                                                                                                                                                                                                                                                                     |                                                                                                                                                                                                                               | Counseling did not appear to promote entry into sexual activity among nonsexually active youth (3% of nonsexually active youth initiated sexual activity during FU)                                                                                                                    | Recall bias                                                                                                                                                                                                           |
| U.S.                           | FU=avg of 7.8 months (range 2–12 months)    |                                                                                                       | Variable frequency but 2 visit minimum                                                                                                                                                                                                                                                                                 |                                                                                                                                                                                                                               |                                                                                                                                                                                                                                                                                        | High attrition rates<br><br>Maturation bias<br><br>Only 5% of youth presented to clinic for FP reasons<br><br>Selection bias (those not returning to clinic excluded; number NR)                                      |
| Brindis (2005) <sup>19</sup>   | Pre-post study; 1 study group               | 1,590 sexually active youth, aged ≤14–20; 90% female; ~40% Hispanic                                   | Peer provider approach with peers meeting with participants at intake and making FU calls (females only) shortly after first visit and quarterly afterwards to reinforce messages, answer questions, etc. Peer providers staff toll-free teen line, which youth can call to receive advice and information, schedule a | <u>Long-term:</u> decrease teen pregnancy<br><br><u>Medium-term:</u> increase contraceptive use, increase use of more effective methods, increase repeat/FU service use<br><br><u>Other:</u> unintended negative consequences | Females demonstrated significant ( $p<0.01$ ) changes from first to last visit in always using birth control (42% vs 61%, OR=1.9), contraceptive use at last intercourse (61% vs 74%, OR=1.8), and use of effective methods (10% vs 49%, OR=3.5); no significant differences for males | Level II-3; high risk for bias<br><br><u>Strengths:</u><br>Peer providers received training.<br><br>Pregnancy tests used<br><br><u>Weaknesses:</u><br>Self-report bias<br><br>Recall bias<br><br>High attrition rates |
| California Wellness Foundation | 1 of 5 peer provider RH clinics, California | Completed initial survey: females, $n=7,486$ ; males, $n=2,151$                                       |                                                                                                                                                                                                                                                                                                                        |                                                                                                                                                                                                                               |                                                                                                                                                                                                                                                                                        |                                                                                                                                                                                                                       |
| U.S.                           | FU=up to 36 months                          | Exclusions: females, $n=6,062$ ;                                                                      |                                                                                                                                                                                                                                                                                                                        |                                                                                                                                                                                                                               |                                                                                                                                                                                                                                                                                        |                                                                                                                                                                                                                       |
|                                | Compared clinic only vs clinic-telephone    |                                                                                                       |                                                                                                                                                                                                                                                                                                                        |                                                                                                                                                                                                                               |                                                                                                                                                                                                                                                                                        |                                                                                                                                                                                                                       |

**Appendix**  
**Impact of Contraceptive Counseling in Clinical Settings: A Systematic Review**  
**Zapata et al.**

| Reference/<br>Funding                                                             | Design/Setting                                                                                                                                                       | Population                                                                                                                                                                                                                                                                                                           | Intervention                                                                                                                                                                                                                                                                                                                                                                                                                                                                                                                                                                      | Outcomes                                                                                           | Results                                                                                                                                                                                                                                                                                                                                                                                                                         | Quality                                                                                                                                                                                                                                                                                                     |
|-----------------------------------------------------------------------------------|----------------------------------------------------------------------------------------------------------------------------------------------------------------------|----------------------------------------------------------------------------------------------------------------------------------------------------------------------------------------------------------------------------------------------------------------------------------------------------------------------|-----------------------------------------------------------------------------------------------------------------------------------------------------------------------------------------------------------------------------------------------------------------------------------------------------------------------------------------------------------------------------------------------------------------------------------------------------------------------------------------------------------------------------------------------------------------------------------|----------------------------------------------------------------------------------------------------|---------------------------------------------------------------------------------------------------------------------------------------------------------------------------------------------------------------------------------------------------------------------------------------------------------------------------------------------------------------------------------------------------------------------------------|-------------------------------------------------------------------------------------------------------------------------------------------------------------------------------------------------------------------------------------------------------------------------------------------------------------|
|                                                                                   |                                                                                                                                                                      | males, $n=1,985$ ;<br>reasons for<br>exclusion included<br>not being sexually<br>active, not<br>receiving a FP visit<br>or male exam<br>during initial visit,<br>or not making a<br>FU visit 3 months<br>later<br><br>Recruitment:<br>individuals<br>requested clinic<br>visit                                       | clinic appointment, and get<br>referrals for other services<br><br>Moderate intensity<br><br>Variable frequency                                                                                                                                                                                                                                                                                                                                                                                                                                                                   |                                                                                                    | As compared with females<br>receiving clinic- only<br>intervention, females<br>receiving FU telephone calls<br>had significantly ( $p<0.05$ )<br>increased odds of returning<br>for annual exam (OR=1.4)<br>and decreased odds of<br>positive pregnancy test at<br>any FU clinic visits<br>(OR=0.9)<br>Female participants reported<br>decreased likelihood of<br>condom use (OR=0.7,<br>$p<0.01$ ) from first to last<br>visit | Selection bias (those not<br>returning to clinic 90 days after<br>initial visit [33%] excluded)<br><br>FU time between first to last<br>visit not reported                                                                                                                                                  |
| Cowley<br>(2002) <sup>20</sup><br><br>Funding<br>source not<br>stated<br><br>U.S. | Pre-post study; 1<br>study group<br><br>Semi-rural<br>comprehensive<br>adolescent health<br>clinic, Colorado<br><br>FU=avg of 10.3<br>months (range 1–<br>29 months) | 39 females aged<br>13–18 considered<br>high risk for early<br>pregnancy with<br>ambivalent<br>pregnancy<br>intentions or<br>desiring pregnancy<br><br>Enrolled: $n=40$<br>(68% Hispanic)<br><br>Recruitment: youth<br>seeking RH<br>services (most<br>seeking pregnancy<br>testing) serially<br>asked to participate | Detailed exploration, using<br>motivational interviewing<br>and narrative therapy, of 6<br>areas: impact of childbearing<br>on life goals; youth hopes<br>and dreams for future; long-<br>term expectations for current<br>relationship; reaction of<br>parents if pregnancy were to<br>occur; current health status;<br>pros and cons of current vs<br>delayed pregnancy; followed<br>the FRAMES-D approach to<br>counseling: feedback,<br>responsibility, and advice-<br>giving, menu of options,<br>empathy, and self-efficacy<br><br>Low intensity<br><br>Frequency: variable | <u>Medium-term:</u><br>increase contraceptive<br>use, increase use of<br>more effective<br>methods | 15/39 (38%) began<br>contraception with 5/39<br>(13%) choosing DMPA and<br>10/39 (26%) choosing OCs;<br>on average, users made 3<br>clinic visits before<br>requesting contraceptives                                                                                                                                                                                                                                           | Level II-3; high risk for bias<br><br><u>Strengths:</u><br>Providers received training<br><br>Used standard provider tool<br>(e.g., Decisional Balance Sheet)<br><br><u>Weaknesses:</u><br>Small sample<br><br>Self selection bias<br><br>Recall bias<br><br>Some (40%) enrolled youth<br>desired pregnancy |

**Appendix**  
**Impact of Contraceptive Counseling in Clinical Settings: A Systematic Review**  
**Zapata et al.**

| Reference/<br>Funding                | Design/Setting                                                                     | Population                                                                  | Intervention                                                                                                                                                                                                                                                                                                   | Outcomes                                                                                                                                              | Results                                                                                                                                                                                              | Quality                                                                                                                                                                              |
|--------------------------------------|------------------------------------------------------------------------------------|-----------------------------------------------------------------------------|----------------------------------------------------------------------------------------------------------------------------------------------------------------------------------------------------------------------------------------------------------------------------------------------------------------|-------------------------------------------------------------------------------------------------------------------------------------------------------|------------------------------------------------------------------------------------------------------------------------------------------------------------------------------------------------------|--------------------------------------------------------------------------------------------------------------------------------------------------------------------------------------|
| Hanna (1993) <sup>23</sup>           | RCT; 2 study groups                                                                | 51 unmarried females aged 16–18 seeking OCs for first time; 98% white, NH   | Based on King’s theory of goal achievement through transactions and the Health Belief Model; included personalized discussions on maturity, responsibility, decision-making, benefits and barriers of contraceptive use, potential barriers to correct use, and developing plans to manage perceived barriers. | <u>Medium-term:</u> increase correct use<br><br><u>Short-term:</u> enhance other psychosocial determinants of contraceptive use                       | Intervention group demonstrated increased correct use of OCs (less frequently missed pills) vs control group (F=4.15, p=0.049)                                                                       | Level I; moderate risk for bias<br><br><u>Strengths:</u><br>Providers received training on protocol<br><br>85% participation rate                                                    |
| Funding source not stated            | 2 rural family planning clinics, Midwest                                           | Intervention group (n=26); control group (n=25); control group received SOC | Low intensity                                                                                                                                                                                                                                                                                                  |                                                                                                                                                       | No significant differences between groups related to contraceptive perceptions (perceived benefits and barriers)                                                                                     | Comparable study groups related to age<br><br><u>Weaknesses:</u><br>Low reliability of instrument                                                                                    |
| U.S.                                 | FU=3 months                                                                        | Potential enrollees: n=60<br>Completed study: n=39<br><br>Recruitment: NR   | Frequency: counseling at 1st clinic visit                                                                                                                                                                                                                                                                      |                                                                                                                                                       |                                                                                                                                                                                                      | Self-report bias<br><br>Recall bias<br><br>Small sample<br><br>Short FU time for behavioral outcomes<br><br>Blinding NR<br><br>Allocation procedures including concealment NR        |
| Kirby (2010) <sup>24</sup>           | RCT; 2 study groups                                                                | 805 sexually active females aged 14–18                                      | Regular services plus 9 FU telephone calls over 12 months that incorporated motivational interviewing to identify discrepancies in current risky behaviors and goals and to reinforce messages (e.g., effectiveness of hormonal method)                                                                        | <u>Long-term:</u> decrease teen pregnancy<br><br><u>Medium-term:</u> increase contraceptive use, increase correct use, increase repeat/FU service use | While study participants as a whole reported an increase in contraceptive use at last intercourse, from 11% at baseline to 44% at 6 months, FU calls did not have any further impact on this outcome | Level I; moderate risk for bias<br><br><u>Strengths:</u><br>Comparable study groups related to age, education, and marital status<br><br>Analyses adjusted for confounding variables |
| William and Flora Hewlett Foundation | Reproductive health clinic affiliated with University of California, San Francisco | Intervention: n=402 (45% Latina; 75% attending HS; 7% married)              |                                                                                                                                                                                                                                                                                                                |                                                                                                                                                       |                                                                                                                                                                                                      |                                                                                                                                                                                      |
| U.S.                                 |                                                                                    |                                                                             |                                                                                                                                                                                                                                                                                                                |                                                                                                                                                       |                                                                                                                                                                                                      |                                                                                                                                                                                      |

**Appendix**  
**Impact of Contraceptive Counseling in Clinical Settings: A Systematic Review**  
**Zapata et al.**

| Reference/<br>Funding       | Design/Setting      | Population                                                                                                                                                                                                 | Intervention                                                                                                                                                                                                                                                       | Outcomes                                                                                                                                                                                     | Results                                                                                                                                                                                                                                                                                                  | Quality                                                                                                                                                                                                                                                                                                                                                                                                                                        |
|-----------------------------|---------------------|------------------------------------------------------------------------------------------------------------------------------------------------------------------------------------------------------------|--------------------------------------------------------------------------------------------------------------------------------------------------------------------------------------------------------------------------------------------------------------------|----------------------------------------------------------------------------------------------------------------------------------------------------------------------------------------------|----------------------------------------------------------------------------------------------------------------------------------------------------------------------------------------------------------------------------------------------------------------------------------------------------------|------------------------------------------------------------------------------------------------------------------------------------------------------------------------------------------------------------------------------------------------------------------------------------------------------------------------------------------------------------------------------------------------------------------------------------------------|
|                             | FU~21 months        | Control: <i>n</i> =403 (35% Latina; 75% attending HS; 8% married); control group received SOC<br><br>Recruitment: research staff and clinicians identified and approached potential participants at clinic | Moderate intensity<br><br>Frequency: monthly/bimonthly                                                                                                                                                                                                             | <u>Short-term:</u> improve satisfaction with service                                                                                                                                         | Intervention did not demonstrate any effect on pregnancy rates; correct use of condoms, OCs, injectables, or patch; number of clinic visits; or satisfaction with services (data not shown)<br><br>Although 89% of intervention group received at least 1 FU call, only 35% recalled receiving the calls | FU time ≥ 1 year<br><br>Counselors received training in protocol<br><br>Randomization assignment made using random number generator<br><br><u>Weaknesses:</u><br>Self selection bias<br><br>Self-report bias<br><br>Recall bias<br><br>Poor intervention completion rates (i.e., counselors averaged ~2.7 of 9 completed calls per participant.<br><br>Unclear how pregnancy was measured.<br><br>Blinding NR<br><br>Allocation concealment NR |
| Winter (1991) <sup>36</sup> | CT; 2 study groups. | 1,256 females aged 18 and younger; 98% white, NH                                                                                                                                                           | Psychosocial model that provided counseling, education, reassurance and social support; addressed peer pressure, parental involvement, confidential services, used visual aids to make information concrete, and scheduled initial visit as two appointments—1 for | <u>Long-term:</u> decrease teen pregnancy<br><br><u>Medium-term:</u> increase contraceptive use, increase continuation of use<br><br><u>Short-term:</u> improve knowledge, satisfaction with | Pregnancy rate among intervention group from original sample (3%) was lower than that of control group from original sample (6%), but differences were not statistically significant at <b><i>p</i>&lt;0.05</b><br><br>Significantly ( <b><i>p</i>&lt;0.05</b> ) more intervention females were          | Level II-1; high risk for bias<br><br><u>Strengths:</u><br>FU time ≥1 year<br><br>Instruments had evidence of validity<br><br>Staff received training in adolescent psychosocial development                                                                                                                                                                                                                                                   |

**Appendix**  
**Impact of Contraceptive Counseling in Clinical Settings: A Systematic Review**  
**Zapata et al.**

| Reference/<br>Funding                                       | Design/Setting           | Population                                                                                                                              | Intervention                                                    | Outcomes                                                                       | Results                                                                                                                                                                                                                                                                                                                                                                                  | Quality                                                                                                                                                                                                                                                                                                                                                                                                                                                                                                                                                 |
|-------------------------------------------------------------|--------------------------|-----------------------------------------------------------------------------------------------------------------------------------------|-----------------------------------------------------------------|--------------------------------------------------------------------------------|------------------------------------------------------------------------------------------------------------------------------------------------------------------------------------------------------------------------------------------------------------------------------------------------------------------------------------------------------------------------------------------|---------------------------------------------------------------------------------------------------------------------------------------------------------------------------------------------------------------------------------------------------------------------------------------------------------------------------------------------------------------------------------------------------------------------------------------------------------------------------------------------------------------------------------------------------------|
|                                                             | experimental<br>clinics) | group received<br>SOC)                                                                                                                  | information, 1 for medical<br>exam                              | service, enhance other<br>psychosocial<br>determinants of<br>contraceptive use | using some method at 6<br>months (97%), and using<br>chosen method at 6 (92%)<br>and 12 (90%) months vs<br>control group females (92%,<br>85%, and 83%, respectively)                                                                                                                                                                                                                    | <u>Weaknesses:</u><br>Self selection bias                                                                                                                                                                                                                                                                                                                                                                                                                                                                                                               |
|                                                             | FU=12 months             | Treatment phase<br>data collected with<br><i>n</i> =1,005 ( <i>n</i> =425 in<br>experimental and<br><i>n</i> =580 in control<br>groups) | Moderate intensity<br><br>Frequency: initial plus 6<br>month FU |                                                                                | No significant differences<br>between groups in<br>satisfaction<br><br>Intervention group reported<br>significantly ( <i>p</i> <0.05) greater<br>ease coping with<br>contraceptive related<br>problems at 6 months FU<br><br>Intervention group had<br>significantly improved<br>knowledge from baseline to<br>FU ( <i>F</i> =4.59, <i>p</i> =0.032); no<br>difference in control group. | Participation rate unknown<br><br>Comparability of groups<br>questionable (baseline data not<br>collected for 80% of<br>participants); experimental sites<br>had elevated satisfaction scores<br>at baseline.<br><br>High attrition<br><br>FU rate ≥15% different between<br>groups at 6 months (~56% for<br>experimental and 89% for<br>control groups); similar at 12<br>months (39% and 38%,<br>respectively)<br><br>No comparison of completers<br>and noncompleters performed<br><br>Self-report bias<br><br>Unclear how pregnancy was<br>measured |
| <b>Adults or Mixed Populations (Adults and Adolescents)</b> |                          |                                                                                                                                         |                                                                 |                                                                                |                                                                                                                                                                                                                                                                                                                                                                                          |                                                                                                                                                                                                                                                                                                                                                                                                                                                                                                                                                         |

**Appendix**  
**Impact of Contraceptive Counseling in Clinical Settings: A Systematic Review**  
**Zapata et al.**

| Reference/<br>Funding                      | Design/Setting                                                       | Population                                                                                                                   | Intervention                                                                                                                                                                                                                                                                                                                                                                                                                                                                                                                                                                                                                                                                                                                                                                                                               | Outcomes                                                    | Results                                                                                                                                                                                                                                                                                             | Quality                                                                                                                                                                                                                                                                                                                                                                                                       |
|--------------------------------------------|----------------------------------------------------------------------|------------------------------------------------------------------------------------------------------------------------------|----------------------------------------------------------------------------------------------------------------------------------------------------------------------------------------------------------------------------------------------------------------------------------------------------------------------------------------------------------------------------------------------------------------------------------------------------------------------------------------------------------------------------------------------------------------------------------------------------------------------------------------------------------------------------------------------------------------------------------------------------------------------------------------------------------------------------|-------------------------------------------------------------|-----------------------------------------------------------------------------------------------------------------------------------------------------------------------------------------------------------------------------------------------------------------------------------------------------|---------------------------------------------------------------------------------------------------------------------------------------------------------------------------------------------------------------------------------------------------------------------------------------------------------------------------------------------------------------------------------------------------------------|
| Adams-Skinner (2009) <sup>15</sup>         | Prospective cohort study; 2 study groups                             | 78 sexually active females aged 15–32 had counseling sessions                                                                | Grounded in motivational interviewing and relapse prevention, focused on client adoption and continued use of dual-method contraception; nurses used semistructured counseling and decision-making tool to help clients select contraception; positive and negative aspects of chosen methods discussed; nurses helped clients anticipate difficulties they might encounter with consistently and correctly using selected methods and helped them identify solutions; individualized action plans of challenges and solutions provided in writing for client to take home; nurses scheduled subsequent call or FU appointments to reinforce method use; counseling session audiotaped and coded to measure 3 domains—promotion of dual protection, relapse prevention counseling, and quality of nurse-client interaction | <u>Medium-term:</u><br>Increase contraceptive use (condoms) | Among total sample, quality of nurse-client interaction was significantly ( $p<0.05$ ) associated with reduction of condom unprotected sex at 6 months FU, controlling for study group (client-defining behaviors, OR=1.57, 95% CI=1.25, 1.97; nurse-defining behaviors OR=1.60, 95% CI=1.04, 2.44) | Level II-2; high risk for bias<br><br><u>Strengths:</u><br>Comparable study groups related to age, ethnicity, education, marital status.<br><br>Domain indices had moderate to high reliability<br><br><u>Weaknesses:</u><br>Selection bias<br><br>Nonblinded coders<br><br>Recall bias<br><br>Self-report bias<br><br>Small sample<br><br><65% recruitment rate<br><br>Short FU time for behavioral outcomes |
| NICHD, National Institute of Mental Health | 4 community health care clinics serving underserved populations, NYC | audiotaped ( $n=36$ in intervention group; $n=42$ in control group who received SOC); 92% non-white, 60% high school or less |                                                                                                                                                                                                                                                                                                                                                                                                                                                                                                                                                                                                                                                                                                                                                                                                                            |                                                             |                                                                                                                                                                                                                                                                                                     |                                                                                                                                                                                                                                                                                                                                                                                                               |
| U.S.                                       | FU=6 months                                                          | 75/176 eligible females declined participation<br><br>Recruitment: clients approached in waiting room of clinic              | Moderate intensity<br><br>Frequency: 2 contacts in 6 months                                                                                                                                                                                                                                                                                                                                                                                                                                                                                                                                                                                                                                                                                                                                                                |                                                             | Among total sample, promotion of dual protection and relapse prevention techniques were not significantly associated with reduction of condom unprotected sex at 6 months FU, controlling for study group                                                                                           |                                                                                                                                                                                                                                                                                                                                                                                                               |



**Appendix**  
**Impact of Contraceptive Counseling in Clinical Settings: A Systematic Review**  
**Zapata et al.**

| Reference/<br>Funding          | Design/Setting                   | Population                                                                                                                                                                                                                                             | Intervention                                                                                                                                                                                                                                      | Outcomes                                                                                           | Results                                                                                                                                                                                                                                      | Quality                                                                                                                                                                                                                                                                                                                                                                                                                                                                                                                                                                                                                     |
|--------------------------------|----------------------------------|--------------------------------------------------------------------------------------------------------------------------------------------------------------------------------------------------------------------------------------------------------|---------------------------------------------------------------------------------------------------------------------------------------------------------------------------------------------------------------------------------------------------|----------------------------------------------------------------------------------------------------|----------------------------------------------------------------------------------------------------------------------------------------------------------------------------------------------------------------------------------------------|-----------------------------------------------------------------------------------------------------------------------------------------------------------------------------------------------------------------------------------------------------------------------------------------------------------------------------------------------------------------------------------------------------------------------------------------------------------------------------------------------------------------------------------------------------------------------------------------------------------------------------|
| Bender<br>(2004) <sup>16</sup> | RCT; 2 study<br>groups           | 276 females aged<br>19–46 requesting<br>pregnancy<br>termination ( <i>n</i> =148<br>in intervention<br>group; <i>n</i> =128 in<br>control group who<br>received<br>contraceptive<br>information only);<br>most (60%)<br>completed primary<br>education | Intensive pretermination<br>contraceptive counseling;<br>included plotting<br>contraceptive history to<br>focus past, present, and<br>future contraceptive use<br>information together to raise<br>participant awareness<br>towards contraception | <u>Medium-term:</u><br>Increase contraceptive<br>use, increase use of<br>more effective<br>methods | No significant difference in<br>the proportions of women in<br>intervention and control<br>groups who initiated<br>postabortion contraceptive<br>use (86.5% vs 85.2%,<br>respectively)                                                       | Level I; moderate risk for bias<br><br><u>Strengths:</u><br>FU rate ≤15% different between<br>groups (70% for intervention<br>and 61% for control groups)<br><br>Women were blinded as to study<br>group assignment<br><br>Randomization assignment made<br>using random numbers table<br><br><u>Weaknesses:</u><br>Significant background<br>differences between groups (age,<br>childbearing, abortion history,<br>education) may have biased<br>results<br><br>Recall bias<br><br>Self-report bias<br><br>May not represent general<br>family planning clients<br>(postabortion sample)<br><br>Allocation concealment NR |
| Iceland                        | FU=4–6 months<br>postabortion    | Recruitment:<br>Individual contact<br>at abortion<br>scheduling visit                                                                                                                                                                                  | Moderate intensity<br><br>Frequency: 2 contacts in 6<br>months                                                                                                                                                                                    |                                                                                                    | No differences in the uptake<br>of more effective methods;<br>OCs were chosen by 61%<br>and 58% of intervention and<br>control group women;<br>injectables chosen by 12%<br>and 11%, respectively                                            |                                                                                                                                                                                                                                                                                                                                                                                                                                                                                                                                                                                                                             |
| Boise<br>(2003) <sup>18</sup>  | Pre-post study; 1<br>study group | 85 females aged<br>18–44 (mean<br>age=25); 38%<br>Latina, 27%<br>African American;                                                                                                                                                                     | Brief individually tailored<br>motivational counseling<br>based on participant<br>responses to risk assessment;<br>variety of contraceptive<br>choices discussed; readiness<br>to use chosen method scored;<br>barriers and aspects of            | <u>Medium-term:</u><br>Increase contraceptive<br>use, increase correct<br>use                      | From baseline to 1 month<br>FU (among completers), any<br>contraceptive use increased<br>from 74% to 91%, consistent<br>condom use (among condom<br>users) increased from 18% to<br>87%, and consistent OC use<br>(among OC users) increased | Level II-3; high risk for bias<br><br><u>Strengths:</u><br>Providers received training on<br>protocol<br><br><u>Weaknesses:</u><br>Self-report bias                                                                                                                                                                                                                                                                                                                                                                                                                                                                         |
| CDC<br>U.S.                    | Medical office<br><br>FU=1 month | 75% college<br>educated; 69%<br>cohabitating; 30                                                                                                                                                                                                       |                                                                                                                                                                                                                                                   |                                                                                                    |                                                                                                                                                                                                                                              |                                                                                                                                                                                                                                                                                                                                                                                                                                                                                                                                                                                                                             |

**Appendix**  
**Impact of Contraceptive Counseling in Clinical Settings: A Systematic Review**  
**Zapata et al.**

| Reference/<br>Funding      | Design/Setting      | Population                                                                                                                            | Intervention                                                                                                                                                                                                                                                                                                                                                                  | Outcomes                                                                                                 | Results                                                                                                                                                                                                                                                                                                                                                                                                                | Quality                                                                                                                                                                                                                                                                                                                                  |
|----------------------------|---------------------|---------------------------------------------------------------------------------------------------------------------------------------|-------------------------------------------------------------------------------------------------------------------------------------------------------------------------------------------------------------------------------------------------------------------------------------------------------------------------------------------------------------------------------|----------------------------------------------------------------------------------------------------------|------------------------------------------------------------------------------------------------------------------------------------------------------------------------------------------------------------------------------------------------------------------------------------------------------------------------------------------------------------------------------------------------------------------------|------------------------------------------------------------------------------------------------------------------------------------------------------------------------------------------------------------------------------------------------------------------------------------------------------------------------------------------|
|                            |                     | considered high risk for STI/HIV                                                                                                      | motivation explored; counselor and participant negotiated risk-reduction steps for client to decrease risk of UIP and STI/HIV; methods provided directly or via referrals; FU offered and counselor made “booster” call to participant 2 weeks after initial session to review risk-reduction steps, identify barriers to completing steps and help overcoming those barriers |                                                                                                          | from 48% to 100%; tests of significance NR                                                                                                                                                                                                                                                                                                                                                                             | High attrition<br>Recall bias<br>Selection bias<br>Small sample<br><65% recruitment rate<br>Short FU time for behavioral outcomes<br>Test of significance NR                                                                                                                                                                             |
|                            |                     | Recruitment: females seeking pregnancy test from medical office were requested to fill out screening questionnaire                    | Moderate intensity<br><br>Frequency: initial plus FU contact 2–4 weeks later                                                                                                                                                                                                                                                                                                  |                                                                                                          |                                                                                                                                                                                                                                                                                                                                                                                                                        |                                                                                                                                                                                                                                                                                                                                          |
| Custo (1987) <sup>21</sup> | RCT; 2 study groups | 200 females aged 16–41 ( <i>n</i> =100 in intervention group; <i>n</i> =100 control group who received SOC); other characteristics NR | Use of provider tool, Adjusted Contraceptive Score, after standard of care counseling; tool intended to help women select the most appropriate contraceptive method and increase satisfaction with chosen method                                                                                                                                                              | <u>Long-term:</u> decrease teen or UIP<br><br><u>Medium-term:</u> Increase use of more effective methods | -Intervention group had lower pregnancy rate (4%) vs control group (11%), but ns<br>-Diaphragm use (most effective contraceptive method examined) significantly ( <i>p</i> <0.05) increased among intervention participants from baseline (9%) to FU (26%); no differences among controls (11% vs 16%, respectively); diaphragm use significantly ( <i>p</i> <0.05) higher among intervention participants at FU (26%) | Level I; moderate risk for bias<br><br><u>Strengths:</u><br>Used standard provider tool<br><br>Comparable study groups related to age, RH history and economic background<br><br>FU rate ≤15% different between groups (95% for intervention and 92% for control group)<br><br>FU time ≥ 1 year<br><br><u>Weaknesses:</u><br>Recall bias |
| Funding source not stated  | Study clinics       |                                                                                                                                       | help women select the most appropriate contraceptive method and increase satisfaction with chosen method                                                                                                                                                                                                                                                                      |                                                                                                          |                                                                                                                                                                                                                                                                                                                                                                                                                        |                                                                                                                                                                                                                                                                                                                                          |
| Italy                      | FU=12–15 months     | Recruitment: females attending study clinics for contraceptive information                                                            | Low intensity<br><br>Frequency: initial visit                                                                                                                                                                                                                                                                                                                                 |                                                                                                          |                                                                                                                                                                                                                                                                                                                                                                                                                        |                                                                                                                                                                                                                                                                                                                                          |

**Appendix**  
**Impact of Contraceptive Counseling in Clinical Settings: A Systematic Review**  
**Zapata et al.**

| Reference/<br>Funding                                                                                        | Design/Setting                                                                               | Population                                                                                                                                                                                                                                                                                                                                                                      | Intervention                                                                                                                                                                                                                                                                                                                                                                                        | Outcomes                                                                                                                                                     | Results                                                                                                                                                                                                                                                                                                                                      | Quality                                                                                                                                                                                                                                                                                                                                                                                                                                                                                              |
|--------------------------------------------------------------------------------------------------------------|----------------------------------------------------------------------------------------------|---------------------------------------------------------------------------------------------------------------------------------------------------------------------------------------------------------------------------------------------------------------------------------------------------------------------------------------------------------------------------------|-----------------------------------------------------------------------------------------------------------------------------------------------------------------------------------------------------------------------------------------------------------------------------------------------------------------------------------------------------------------------------------------------------|--------------------------------------------------------------------------------------------------------------------------------------------------------------|----------------------------------------------------------------------------------------------------------------------------------------------------------------------------------------------------------------------------------------------------------------------------------------------------------------------------------------------|------------------------------------------------------------------------------------------------------------------------------------------------------------------------------------------------------------------------------------------------------------------------------------------------------------------------------------------------------------------------------------------------------------------------------------------------------------------------------------------------------|
|                                                                                                              |                                                                                              |                                                                                                                                                                                                                                                                                                                                                                                 |                                                                                                                                                                                                                                                                                                                                                                                                     |                                                                                                                                                              | than intervention participants (16%)                                                                                                                                                                                                                                                                                                         | Recruitment rate NR<br><br>Lack of blinding<br><br>Allocation procedures including concealment NR                                                                                                                                                                                                                                                                                                                                                                                                    |
| Gilliam (2004) <sup>22</sup>                                                                                 | RCT; 2 study groups                                                                          | 33 unmarried females aged 15–25 with UIP who expressed intention to use OCs                                                                                                                                                                                                                                                                                                     | Theory-based, multimedia, postpartum educational intervention and individual counseling prior to hospital discharge; counseling emphasized self-efficacy, what to do if a dose is missed, backup contraceptive methods, contact telephone numbers, and when to contact a nurse or physician; all written material was reviewed in detail; videotape based on principles of self-efficacy was viewed | <u>Long-term:</u> Decrease teen or unintended pregnancy<br><br><u>Medium-term:</u> Increase continuation of use<br><br><u>Short-term:</u> Increase knowledge | At 1 year, no significant differences between intervention and control groups in repeat pregnancy rates (12% vs 8%, respectively) or continued use of OCs (16% vs 12%, respectively)<br><br>Among the participants with complete data at 12 months ( <i>n</i> =14), a significant positive change in knowledge was observed vs control group | Level I; moderate risk for bias<br><br><u>Strengths:</u><br>FU time ≥ 1 year<br><br>Research team members blinded to group assignment<br><br>Randomization assignment made using random numbers table<br><br>Allocation concealed<br><br><u>Weaknesses:</u><br>Small sample<br><br>Self-report bias<br><br>High attrition<br><br>FU rate ≥15% different between groups (89% for intervention and 60% for control group)<br><br>May not represent general family planning clients (postpartum sample) |
| American College of Obstetricians and Gynecologists / Park-Davis Research Award in Contraception<br><br>U.S. | Resident run clinic serving low-income women receiving public assistance<br><br>FU=12 months | postpartum ( <i>n</i> =18 in intervention group; <i>n</i> =15 in control group who received SOC); 100% African American; 37% college-educated; 75% unemployed<br><br>Enrolled: <i>n</i> =43<br>12 month FU: <i>n</i> =25 ( <i>n</i> =16 in intervention group and <i>n</i> =9 in control group)<br><br>Recruitment: received informational flyer at time of 1st visit to clinic | Low intensity<br><br>Frequency: one time intervention immediately postpartum                                                                                                                                                                                                                                                                                                                        |                                                                                                                                                              |                                                                                                                                                                                                                                                                                                                                              |                                                                                                                                                                                                                                                                                                                                                                                                                                                                                                      |
| Langston (2010) <sup>25</sup>                                                                                | RCT; 2 study groups                                                                          | 222 females aged 18–45 postabortion ( <i>n</i> =114 in intervention group;                                                                                                                                                                                                                                                                                                      | Structured, standardized, nondirective counseling using a version of the WHO Decision-Making Tool;                                                                                                                                                                                                                                                                                                  | <u>Medium-term:</u> increase use of more effective methods,                                                                                                  | No significant differences between groups in choice of method (50% of intervention and 58% of control group                                                                                                                                                                                                                                  | Level I; moderate risk for bias<br><br><u>Strengths:</u>                                                                                                                                                                                                                                                                                                                                                                                                                                             |

**Appendix**  
**Impact of Contraceptive Counseling in Clinical Settings: A Systematic Review**  
**Zapata et al.**

| Reference/<br>Funding                                                                        | Design/Setting                                                                           | Population                                                                                                                                                                                                                                                                                                                                                                      | Intervention                                                                                                                                                                                                                                                                                                                                                                                                 | Outcomes                                             | Results                                                                                                                                                                                                                                                                                                                                                                                                                                                                                                                                                                                       | Quality                                                                                                                                                                                                                                                                                                                                                                                                                                                                                                                                          |
|----------------------------------------------------------------------------------------------|------------------------------------------------------------------------------------------|---------------------------------------------------------------------------------------------------------------------------------------------------------------------------------------------------------------------------------------------------------------------------------------------------------------------------------------------------------------------------------|--------------------------------------------------------------------------------------------------------------------------------------------------------------------------------------------------------------------------------------------------------------------------------------------------------------------------------------------------------------------------------------------------------------|------------------------------------------------------|-----------------------------------------------------------------------------------------------------------------------------------------------------------------------------------------------------------------------------------------------------------------------------------------------------------------------------------------------------------------------------------------------------------------------------------------------------------------------------------------------------------------------------------------------------------------------------------------------|--------------------------------------------------------------------------------------------------------------------------------------------------------------------------------------------------------------------------------------------------------------------------------------------------------------------------------------------------------------------------------------------------------------------------------------------------------------------------------------------------------------------------------------------------|
| Anonymous<br>Foundation<br><br>U.S.                                                          | Private practice<br>setting; Columbia<br>University<br>Medical Center<br><br>FU=3 months | <i>n</i> =108 in control<br>group who<br>received SOC);<br>most Latina<br>(>85%) and high<br>school graduates<br>(>65%); 94%<br>sought induced<br>abortion<br><br>250 randomized/<br>380 screened<br><br>3 month FU: <i>n</i> =96<br>for intervention<br>and <i>n</i> =90 for<br>control group<br><br>Recruitment:<br>family planning<br>clinic referral to<br>private practice | trained counselor read and<br>displayed a contraceptive<br>flipchart in a private setting,<br>with the various methods<br>available for the participant<br>to see and handle; counseling<br>included both audio and<br>visual components;<br>participants were supplied<br>note cards on which to write<br>questions<br><br>Low intensity<br><br>Frequency: one time at visit<br>to private practice setting | increase continuation<br>of use                      | selected a very effective<br>method (IUD, implant or<br>sterilization); 42% of<br>intervention and 34% of<br>control group selected an<br>effective method (injectable,<br>ring, patch, or pill)<br><br>-No significant differences<br>between groups in<br>continuation of chosen<br>method at 3 months; among<br>those choosing very effective<br>methods, 3 month<br>continuation rates were 85%<br>and 77% for intervention and<br>control groups; among those<br>choosing effective methods,<br>3 month continuation rates<br>were 68% and 68% for<br>intervention and control<br>groups | Comparable study groups related<br>to background characteristics<br><br>FU rate ≤15% different for<br>groups (84% for intervention<br>and 83% for control group)<br><br>Providers received training on<br>protocol<br><br>Randomization assignment made<br>using random numbers table<br><br>Allocation concealed<br><br><u>Weaknesses:</u><br>Selection bias<br><br>High attrition<br><br>Short FU time for behavioral<br>outcomes<br><br>Lack of blinding<br><br>May not represent general<br>family planning clients<br>(postabortion sample) |
| Lee (2011) <sup>26</sup><br><br>Data funded<br>by AHRQ;<br>PI funded by<br>NICHD<br><br>U.S. | Cross-sectional<br>survey<br><br>4 primary care<br>clinics,<br>Pennsylvania              | 770 females aged<br>18–50; 94%<br>White, NH; >85%<br>at least some<br>college<br><br>Recruitment:<br>invited to<br>participate                                                                                                                                                                                                                                                  | Contraceptive counseling<br>provided by primary care<br>physician; may have<br>included discussion of<br>different contraceptive<br>methods; little detail<br>provided<br><br>Low intensity                                                                                                                                                                                                                  | <u>Medium-term:</u><br>Increase contraceptive<br>use | Participants who received<br>counseling on any method<br>had increased odds of<br>reporting use of a hormonal<br>method at last intercourse<br>(OR=2.68, CI=1.48, 4.87) vs<br>those who did not receive<br>counseling                                                                                                                                                                                                                                                                                                                                                                         | Level II-3; high risk for bias<br><br><u>Strengths:</u><br>Analyses adjusted for<br>confounding variables<br><br><u>Weaknesses:</u><br>Recall bias                                                                                                                                                                                                                                                                                                                                                                                               |

**Appendix**  
**Impact of Contraceptive Counseling in Clinical Settings: A Systematic Review**  
**Zapata et al.**

| Reference/<br>Funding                    | Design/Setting                                                 | Population                                                                                                                                                                 | Intervention                                                                                                                                                                                                                                                                                                                                                                                                                                                              | Outcomes                                                                                                                                | Results                                                                                                                                                                                                                                                                                                                                                                                                                                                                                                                                                                                                                                                                                | Quality                                                                                                                                                                                                                                                                                                                                                                                                            |
|------------------------------------------|----------------------------------------------------------------|----------------------------------------------------------------------------------------------------------------------------------------------------------------------------|---------------------------------------------------------------------------------------------------------------------------------------------------------------------------------------------------------------------------------------------------------------------------------------------------------------------------------------------------------------------------------------------------------------------------------------------------------------------------|-----------------------------------------------------------------------------------------------------------------------------------------|----------------------------------------------------------------------------------------------------------------------------------------------------------------------------------------------------------------------------------------------------------------------------------------------------------------------------------------------------------------------------------------------------------------------------------------------------------------------------------------------------------------------------------------------------------------------------------------------------------------------------------------------------------------------------------------|--------------------------------------------------------------------------------------------------------------------------------------------------------------------------------------------------------------------------------------------------------------------------------------------------------------------------------------------------------------------------------------------------------------------|
|                                          | FU=up to 1 month (7–30 days) post visit                        | immediately after index visit                                                                                                                                              | Frequency: at index visit                                                                                                                                                                                                                                                                                                                                                                                                                                                 |                                                                                                                                         | Participants who received counseling about a specific method had increased odds of reporting use of that method at last intercourse (OR=4.78, CI=3.70, 11.37 for hormonal methods; OR=18.45, CI=4.88, 69.84 for LARCs)                                                                                                                                                                                                                                                                                                                                                                                                                                                                 | Not all patients received same counseling<br><br>Short FU time for behavioral outcomes<br><br>Low response rate to survey (19%); responders were more likely to be white, have more education, and to be established patients at clinic                                                                                                                                                                            |
| Namerow (1989) <sup>27</sup>             | CT; 2 study groups                                             | 823 females aged ≤17–≥23 (n=412 in intervention group; n=411 in control group who received SOC); 50% Latina; 41% African American; 56% high school graduates; 48% Medicaid | Contingency planning counseling program with 5 components—participant asked to articulate a pregnancy goal; participant’s perceived probability of pregnancy is determined; specific method selected, the length of time for which it would be used, and what the participant would need to do to use it effectively specified; contingencies that might arise subsequently and interfere with correct use; and detailed plans for dealing with each contingency outlined | <u>Long-term:</u> Decrease teen or unintended pregnancy<br><br><u>Medium-term:</u> Increase correct use, increase repeat/FU service use | No significant difference between intervention and control groups in UIP rates at 6 and 12 months FU (~7% became pregnant in each group by 6 months, ~15% by 12 months); among previously pregnant females, those in intervention group had significantly ( $p<0.05$ ) decreased odds (50%) of experiencing UIP within 6 months vs those in control group; by 12 months, differences disappeared<br><br>Among OC users (n=319), those in intervention vs control group reported significantly ( $p<0.05$ ) higher correct use (i.e., taking pills every day) (53% vs 43%); among OC users that had missed pills (n=166), those in intervention vs control group reported significantly | Level II-1; high risk for bias<br><br><u>Strengths:</u><br>High participation (90%)<br><br>Comparable study groups related to age, ethnicity, education, marital status, Medicaid status, and past pregnancy<br><br>FU time ≥ 1 year<br><br>FU rate ≤15% different for groups (73% for both groups)<br><br><u>Weaknesses:</u><br>High attrition<br><br>Recall bias<br><br>Self-report bias<br><br>Lack of blinding |
| Office of Population Affairs<br><br>U.S. | Hospital-based family planning clinic, NYC<br><br>FU=12 months | Enrolled: n=914<br><br>Recruitment: family planning patients deemed in need of individual counseling                                                                       | Program also included opportunities to: specify in writing when patient would next have contact with counselor or make a clinic visit; what would be done if an appointment could not be                                                                                                                                                                                                                                                                                  |                                                                                                                                         |                                                                                                                                                                                                                                                                                                                                                                                                                                                                                                                                                                                                                                                                                        |                                                                                                                                                                                                                                                                                                                                                                                                                    |

**Appendix**  
**Impact of Contraceptive Counseling in Clinical Settings: A Systematic Review**  
**Zapata et al.**

| Reference/<br>Funding       | Design/Setting      | Population                                                                                                  | Intervention                                                                                                                                                                                                                                                                                                                                                                                                                                              | Outcomes                                                                                                                                                              | Results                                                                                                                                                                                                                                                                                             | Quality                                                                                                                                                                                                                                         |
|-----------------------------|---------------------|-------------------------------------------------------------------------------------------------------------|-----------------------------------------------------------------------------------------------------------------------------------------------------------------------------------------------------------------------------------------------------------------------------------------------------------------------------------------------------------------------------------------------------------------------------------------------------------|-----------------------------------------------------------------------------------------------------------------------------------------------------------------------|-----------------------------------------------------------------------------------------------------------------------------------------------------------------------------------------------------------------------------------------------------------------------------------------------------|-------------------------------------------------------------------------------------------------------------------------------------------------------------------------------------------------------------------------------------------------|
|                             |                     |                                                                                                             | kept; and how the counselor and clinic could help participant practice effective contraception                                                                                                                                                                                                                                                                                                                                                            |                                                                                                                                                                       | ( <i>p</i> < <b>0.01</b> ) more women taking the forgotten pills appropriately (89% vs 68%)                                                                                                                                                                                                         |                                                                                                                                                                                                                                                 |
|                             |                     |                                                                                                             | Participant received written copy of Pregnancy Prevention Plan                                                                                                                                                                                                                                                                                                                                                                                            |                                                                                                                                                                       | No difference in clinic attendance between the intervention and control groups was observed (percentages NR)                                                                                                                                                                                        |                                                                                                                                                                                                                                                 |
|                             |                     |                                                                                                             | Low intensity                                                                                                                                                                                                                                                                                                                                                                                                                                             |                                                                                                                                                                       |                                                                                                                                                                                                                                                                                                     |                                                                                                                                                                                                                                                 |
|                             |                     |                                                                                                             | Frequency: Index visit                                                                                                                                                                                                                                                                                                                                                                                                                                    |                                                                                                                                                                       |                                                                                                                                                                                                                                                                                                     |                                                                                                                                                                                                                                                 |
| Nobili (2007) <sup>28</sup> | RCT; 2 study groups | 43 females aged 18–44 ( <i>n</i> =21 in intervention group; <i>n</i> =22 in control group who received SOC) | Patient-centered contraceptive counseling; phase 1 included semi-structured interview that explored past and present contraceptive experiences, barriers to use, perceptions of risk and future plans; phase 2 offered education; presented advantages and disadvantages of available methods and explanations on how to obtain and use each method; phase 3 involved choosing method and knowledge test; participant questions and doubts were addressed | <u>Medium-term:</u> Increase use of more effective methods<br><br><u>Short-term:</u> Increase knowledge, enhance other psychosocial determinants of contraceptive use | Intervention group demonstrated a significant ( <i>p</i> < <b>0.005</b> ) increase in the use of effective methods between baseline (20%) and 1 and 3 months FU (65% and 80%, respectively); no changes in control group between baseline (19%) and FU were detected (32% and 38%, respectively)    | Level I; moderate risk for bias<br><br><u>Strengths:</u><br>Research team members blinded to group assignment<br><br>Comparable study groups related to age, education, marital status, parity and occupation<br><br>High completion rate (95%) |
| Funding source not stated   | University hospital | Eligible: <i>n</i> =70                                                                                      |                                                                                                                                                                                                                                                                                                                                                                                                                                                           |                                                                                                                                                                       |                                                                                                                                                                                                                                                                                                     |                                                                                                                                                                                                                                                 |
| Italy                       | FU=3 months         | Completed FU: <i>n</i> =20 in intervention group; <i>n</i> =21 in control group                             |                                                                                                                                                                                                                                                                                                                                                                                                                                                           |                                                                                                                                                                       | At baseline there was no difference in knowledge or attitudes towards contraception; at 1 month FU, the intervention group demonstrated significant ( <i>p</i> < <b>0.0005</b> ) increase in both knowledge and positive attitude toward contraception vs nonsignificant results from control group | FU rate ≤15% different for groups (95% for both groups)<br><br><u>Weaknesses:</u><br>Low participation (61%)<br><br>Small sample size<br><br>Short FU time for behavioral outcomes<br><br>Allocation procedures including concealment NR        |
|                             |                     | Recruitment: invited by staff to participate at time of visit to clinic to request pregnancy termination    | Low intensity                                                                                                                                                                                                                                                                                                                                                                                                                                             | Frequency: single session with FU                                                                                                                                     |                                                                                                                                                                                                                                                                                                     |                                                                                                                                                                                                                                                 |

**Appendix**  
**Impact of Contraceptive Counseling in Clinical Settings: A Systematic Review**  
**Zapata et al.**

| Reference/<br>Funding                                  | Design/Setting                                   | Population                                                                                                                                                                                                                           | Intervention                                                                                                                                                                                                                                                                                                                                                                                                                                                                                                                                                                                                                                                    | Outcomes                                                                                                                                                    | Results                                                                                                                                                                                                                                                                                                                                                                                                                                                                                                                                                                          | Quality                                                                                                                                                                                                                                                                                                                                                                                                                                                                                                                                                                                |
|--------------------------------------------------------|--------------------------------------------------|--------------------------------------------------------------------------------------------------------------------------------------------------------------------------------------------------------------------------------------|-----------------------------------------------------------------------------------------------------------------------------------------------------------------------------------------------------------------------------------------------------------------------------------------------------------------------------------------------------------------------------------------------------------------------------------------------------------------------------------------------------------------------------------------------------------------------------------------------------------------------------------------------------------------|-------------------------------------------------------------------------------------------------------------------------------------------------------------|----------------------------------------------------------------------------------------------------------------------------------------------------------------------------------------------------------------------------------------------------------------------------------------------------------------------------------------------------------------------------------------------------------------------------------------------------------------------------------------------------------------------------------------------------------------------------------|----------------------------------------------------------------------------------------------------------------------------------------------------------------------------------------------------------------------------------------------------------------------------------------------------------------------------------------------------------------------------------------------------------------------------------------------------------------------------------------------------------------------------------------------------------------------------------------|
|                                                        |                                                  |                                                                                                                                                                                                                                      |                                                                                                                                                                                                                                                                                                                                                                                                                                                                                                                                                                                                                                                                 |                                                                                                                                                             |                                                                                                                                                                                                                                                                                                                                                                                                                                                                                                                                                                                  | May not represent general family planning clients (postabortion sample)                                                                                                                                                                                                                                                                                                                                                                                                                                                                                                                |
| Petersen (2007) <sup>29</sup>                          | RCT; 2 study groups                              | 708 females aged 16–44 ( <i>n</i> =336 in intervention group; <i>n</i> =372 in control group who received general preventive health counseling (e.g., smoking, diet); 62% white; 84% high school graduate or GED; 45% never married) | Behavior-based contraceptive counseling using motivational interviewing techniques, including discussion of all available types of contraceptives and which method might be the most appropriate, and the opportunity for EC information and advance prescription; counselors evaluated participant pregnancy intention, contraceptive use patterns, and high risk sexual behaviors. Individualized risk reduction strategies discussed; participants obtained or received referral for any type of contraceptive; booster session focused on client progress toward meeting specific risk reduction steps and adopting consistent, effective contraceptive use | <u>Long-term:</u> Decrease teen or unintended pregnancy<br><br><u>Medium-term:</u> Increase correct use<br><br><u>Short-term:</u> satisfaction with service | No significant difference in UIP between groups at 2, 8, or 12 months FU (percentages NR)<br><br>Among condom users, the proportion reporting correct use (use during every act of intercourse) did not differ between intervention and control groups at any FU point<br><br>Intervention participants reported high levels of satisfaction (82% reported that it was helpful to talk to the educator about contraception, 90% reported that the educator had focused on their individual concerns, and 93% reported that all of their questions had been adequately addressed) | Level I; moderate risk for bias<br><br><u>Strengths:</u><br>High participation rate (96% of eligible females were randomized)<br><br>Comparable study groups related to age, education, marital status, and race/ethnicity<br><br>High completion rate (98% of intervention and 90% of control group)<br><br>FU rate ≤15% different for groups<br><br>FU time ≥1 year<br><br>Pregnancy tests used<br><br>Randomization assignment made using random numbers table<br><br>Allocation concealed<br><br><u>Weaknesses:</u><br>Recall bias<br><br>Self-report bias<br><br>Lack of blinding |
| Petersen (2007) <sup>30</sup>                          | 3 primary health care settings in North Carolina |                                                                                                                                                                                                                                      |                                                                                                                                                                                                                                                                                                                                                                                                                                                                                                                                                                                                                                                                 |                                                                                                                                                             |                                                                                                                                                                                                                                                                                                                                                                                                                                                                                                                                                                                  |                                                                                                                                                                                                                                                                                                                                                                                                                                                                                                                                                                                        |
| CDC, Association for Prevention, Teaching and Research | FU=12 months                                     |                                                                                                                                                                                                                                      |                                                                                                                                                                                                                                                                                                                                                                                                                                                                                                                                                                                                                                                                 |                                                                                                                                                             |                                                                                                                                                                                                                                                                                                                                                                                                                                                                                                                                                                                  |                                                                                                                                                                                                                                                                                                                                                                                                                                                                                                                                                                                        |
| U.S.                                                   |                                                  | Eligible and enrolled: <i>n</i> =737<br><br>Complete FU data: <i>n</i> =329 in intervention group and <i>n</i> =335 in control group<br><br>Recruitment: approached by study personnel at primary health care setting                |                                                                                                                                                                                                                                                                                                                                                                                                                                                                                                                                                                                                                                                                 |                                                                                                                                                             |                                                                                                                                                                                                                                                                                                                                                                                                                                                                                                                                                                                  |                                                                                                                                                                                                                                                                                                                                                                                                                                                                                                                                                                                        |
|                                                        |                                                  |                                                                                                                                                                                                                                      | Low intensity<br><br>Frequency: initial counseling and 2-month booster session                                                                                                                                                                                                                                                                                                                                                                                                                                                                                                                                                                                  |                                                                                                                                                             |                                                                                                                                                                                                                                                                                                                                                                                                                                                                                                                                                                                  |                                                                                                                                                                                                                                                                                                                                                                                                                                                                                                                                                                                        |

**Appendix**  
**Impact of Contraceptive Counseling in Clinical Settings: A Systematic Review**  
**Zapata et al.**

| Reference/<br>Funding                 | Design/Setting                                                           | Population                                                                                                                                         | Intervention                                                                                                                                                                                                                                                                                         | Outcomes                                                         | Results                                                                                                                                                                                | Quality                                                                                                                                                                                                                                                                                                                                                             |
|---------------------------------------|--------------------------------------------------------------------------|----------------------------------------------------------------------------------------------------------------------------------------------------|------------------------------------------------------------------------------------------------------------------------------------------------------------------------------------------------------------------------------------------------------------------------------------------------------|------------------------------------------------------------------|----------------------------------------------------------------------------------------------------------------------------------------------------------------------------------------|---------------------------------------------------------------------------------------------------------------------------------------------------------------------------------------------------------------------------------------------------------------------------------------------------------------------------------------------------------------------|
| Proctor<br>(2006) <sup>31</sup>       | RCT; 3 study<br>groups                                                   | 319 postpartum<br>females, mean age<br>23.4; n=117 in<br>video arm; n=101<br>in literature arm;                                                    | Three different postpartum<br>contraceptive counseling<br>methods: (1) <u>video arm</u> ,<br>which is a video that gives<br>overview of risks and<br>benefits of each method;                                                                                                                        | <u>Medium-term:</u><br>Increase use of more<br>effective methods | No difference was identified<br>in the contraceptive method<br>chosen between the 3 arms                                                                                               | Some participants had<br>ambivalent pregnancy intentions<br>Level I; high risk for bias                                                                                                                                                                                                                                                                             |
| Carolinas<br>Healthcare<br>Foundation | Urban medical<br>center (Carolinas<br>Medical Center,<br>North Carolina) | n=101 in physician<br>arm; 53% Latina;<br>36% African<br>American; 42%<br>less than high<br>school education                                       | physician is available to<br>answer questions, but<br>prohibited from engaging in<br>discussion; (2) <u>literature arm</u> ,<br><u>which is</u> companion<br>literature that directs<br>counseling; physician is<br>available to answer<br>questions, but prohibited<br>from engaging in discussion; | <u>Short-term:</u><br>satisfaction with<br>service               | >90% of participants in each<br>arm were satisfied with their<br>counseling, with<br>significantly ( $p<0.05$ ) higher<br>levels of satisfaction in the<br>physician-patient arm (99%) | <u>Strengths:</u><br>High completion rate (97%<br>overall)<br><br>Comparable study groups related<br>to age, race, parity, education or<br>mode of delivery                                                                                                                                                                                                         |
| U.S.                                  | FU=8 months                                                              | Initially<br>randomized:<br>n=329<br><br>Recruitment:<br>individuals<br>attending<br>postpartum service<br>were invited to<br>participate in study | and (3) <u>physician-patient<br/>face-to-face session, which<br/>include</u> interaction that was<br>not scripted or limited in any<br>way.<br><br>Low intensity<br><br>Frequency: single instance<br>for each intervention                                                                          |                                                                  |                                                                                                                                                                                        | Randomization assignment made<br>using random numbers table<br><br>Allocation concealed<br><br><u>Weaknesses:</u><br>Not all patients in the physician<br>arm received same counseling<br><br>Recruitment rate NR<br><br>Completion rate by study group<br>NR<br><br>Blinding NR<br><br>May not represent general<br>family planning clients<br>(postpartum sample) |
| Schunmann<br>(2006) <sup>32</sup>     | RCT; 2 study<br>groups                                                   | 613 females, mean<br>age 24; n=316 in<br>intervention group;<br>n=297 in control                                                                   | Brief individualized<br>discussion of future<br>contraception during initial<br>consultation and assessment;<br>postabortion interview with                                                                                                                                                          | <u>Long-term:</u> Decrease<br>teen or unintended<br>pregnancy    | At 24 months FU, case note<br>review found that 15% of<br>intervention and 10% of<br>control group women had at                                                                        | Level I; moderate risk for bias<br><br><u>Strengths:</u>                                                                                                                                                                                                                                                                                                            |
| Scottish<br>Executive                 |                                                                          |                                                                                                                                                    |                                                                                                                                                                                                                                                                                                      |                                                                  |                                                                                                                                                                                        |                                                                                                                                                                                                                                                                                                                                                                     |



**Appendix**  
**Impact of Contraceptive Counseling in Clinical Settings: A Systematic Review**  
**Zapata et al.**

| Reference/<br>Funding                                                                            | Design/Setting                                                | Population                                                                                                                                                                                                                                                                                                                                                       | Intervention                                                                                                                                                                                                                                                                                                                                                                                                                                                                                                                                                                   | Outcomes                                                                                                                            | Results                                                                                                                                                                                                                                                                                                                                                                                                                                                                                                                                                                                                                          | Quality                                                                                                                                                                                                                                                                                                                                                                                                                                                                                                                                                                                                                                                                                                                     |
|--------------------------------------------------------------------------------------------------|---------------------------------------------------------------|------------------------------------------------------------------------------------------------------------------------------------------------------------------------------------------------------------------------------------------------------------------------------------------------------------------------------------------------------------------|--------------------------------------------------------------------------------------------------------------------------------------------------------------------------------------------------------------------------------------------------------------------------------------------------------------------------------------------------------------------------------------------------------------------------------------------------------------------------------------------------------------------------------------------------------------------------------|-------------------------------------------------------------------------------------------------------------------------------------|----------------------------------------------------------------------------------------------------------------------------------------------------------------------------------------------------------------------------------------------------------------------------------------------------------------------------------------------------------------------------------------------------------------------------------------------------------------------------------------------------------------------------------------------------------------------------------------------------------------------------------|-----------------------------------------------------------------------------------------------------------------------------------------------------------------------------------------------------------------------------------------------------------------------------------------------------------------------------------------------------------------------------------------------------------------------------------------------------------------------------------------------------------------------------------------------------------------------------------------------------------------------------------------------------------------------------------------------------------------------------|
| for the<br>Scottish<br>Health<br>Demonstrati<br>on Project<br>Healthy<br>Respect<br><br>Scotland | Royal Infirmary<br>of Edinburgh<br>clinic<br><br>FU=24 months | group who<br>received SOC<br><br>Assessed for<br>eligibility: $n=1,151$<br><br>Complete FU data<br>at 4 months: $n=199$<br>in intervention<br>group and $n=178$<br>in control group<br><br>Complete case<br>notes at 24<br>months: $n=302$ in<br>intervention group<br>and $n=268$ in<br>control group<br><br>Recruitment:<br>invited by staff to<br>participate | physician and specialist<br>trained in contraception to<br>solicit details regarding<br>demographics, full<br>reproductive history, and<br>contraceptive use at time of<br>conception; preferred<br>method of postabortion<br>contraceptive ascertained<br>with 3 month supply of<br>chosen method of dispensed<br>if possible; if IUD was<br>chosen, appointment with<br>local family planning clinic<br>arranged for insertion 2<br>weeks postabortion;<br>condoms and written<br>information provided<br><br>Low intensity<br><br>Frequency: assessment and<br>postabortion | <u>Medium-term:</u><br>increase contraceptive<br>use, increase use of<br>more effective<br>methods, increase<br>continuation of use | least 1 further UIP that<br>resulted in termination (ns)<br><br>At 4 months FU, 88% of<br>intervention and 89% of<br>control group women were<br>using contraception (ns);<br>significantly ( $p<0.05$ ) more<br>women in the intervention<br>(37%) than control (26%)<br>group were using a longer-<br>acting method (IUD,<br>implant, injectable)<br><br>At 4 months FU,<br>continuation rates for<br>intervention vs control<br>women were 86% vs 80%<br>for COCs, 64% vs 100% for<br>POPs, 75% vs 100% for<br>barrier methods, 66% vs<br>50% for IUD, 33% vs 20%<br>for IUS, and 86% vs 69% for<br>injectables (all were ns) | Comparable study groups related<br>to age and deprivation<br>(calculated from ZIP codes)<br><br>FU rate $\leq 15\%$ different for<br>groups (63% for intervention<br>and 60% for control group)<br><br>FU time $\geq 1$ year<br><br>Randomization assignment (of<br>calendar weeks) made using<br>random numbers table<br><br><u>Weaknesses:</u><br>$\leq 65\%$ recruitment rate<br><br>High attrition<br><br>Differences in background<br>characteristic between<br>completers and noncompleters<br>related to parity, education, and<br>past abortion)<br><br>Recording bias<br><br>Lack of blinding<br><br>Allocation not concealed<br><br>May not represent general<br>family planning clients<br>(postabortion sample) |
| Shlay<br>(2003) <sup>33</sup>                                                                    | RCT; 2 study<br>groups                                        | 877 females aged<br>$\sim 15-49$ ; $n=437$ in<br>intervention group;                                                                                                                                                                                                                                                                                             | STI clinic-initiated enhanced<br>contraceptive care followed<br>by facilitated referral to a                                                                                                                                                                                                                                                                                                                                                                                                                                                                                   | <u>Long-term:</u> Decrease<br>teen or unintended<br>pregnancy                                                                       | At 12 months FU, no<br>significant differences<br>between intervention and                                                                                                                                                                                                                                                                                                                                                                                                                                                                                                                                                       | Level 1; moderate risk for bias<br><br><u>Strengths:</u>                                                                                                                                                                                                                                                                                                                                                                                                                                                                                                                                                                                                                                                                    |

**Appendix**  
**Impact of Contraceptive Counseling in Clinical Settings: A Systematic Review**  
**Zapata et al.**

| Reference/<br>Funding                                                      | Design/Setting                                                                         | Population                                                                                                                                                                                                                                                                                                                     | Intervention                                                                                                                                                                                                                                                                                                                                                                                                                                                     | Outcomes                                                                                                                | Results                                                                                                                                                                                                                                                                                                                                                                                                                                                                                                                                                                                                                                                                   | Quality                                                                                                                                                                                                                                                                                                                                                                                                                                    |
|----------------------------------------------------------------------------|----------------------------------------------------------------------------------------|--------------------------------------------------------------------------------------------------------------------------------------------------------------------------------------------------------------------------------------------------------------------------------------------------------------------------------|------------------------------------------------------------------------------------------------------------------------------------------------------------------------------------------------------------------------------------------------------------------------------------------------------------------------------------------------------------------------------------------------------------------------------------------------------------------|-------------------------------------------------------------------------------------------------------------------------|---------------------------------------------------------------------------------------------------------------------------------------------------------------------------------------------------------------------------------------------------------------------------------------------------------------------------------------------------------------------------------------------------------------------------------------------------------------------------------------------------------------------------------------------------------------------------------------------------------------------------------------------------------------------------|--------------------------------------------------------------------------------------------------------------------------------------------------------------------------------------------------------------------------------------------------------------------------------------------------------------------------------------------------------------------------------------------------------------------------------------------|
| NICHD<br><br>U.S.                                                          | STI clinic operated by Denver Public Health<br><br>FU=12 months                        | <i>n</i> =440 in control group; both groups received condoms with spermicide and a referral list of PCPs for ongoing RH care; 30% Latina; 25% African American; 61% no health care insurance<br><br>Eligible: <i>n</i> =1,909<br><br>Total available for FU: <i>n</i> =794<br><br>Recruitment: invited by staff to participate | PCP to establish relationship, improve contraceptive adherence, and decrease UIP; care included individual medical screening, individual counseling about all potential methods available at the clinic, and methods available through a PCP; participants had method of choice initiated in clinic at enrollment or early FU visit; multiple client contacts to facilitate PCP referral for ongoing care<br><br>Low intensity<br><br>Frequency: initial contact | <u>Medium-term:</u><br>Increase use of more effective methods, increase repeat/FU service use, increase dual-method use | control groups in pregnancy rates (24% vs 28%)<br><br>Significantly ( <i>p</i> <0.0001) more intervention than control women reported use of effective contraceptives at 4 months (50% vs 22%) and 8 months (44% and 26%) FU; however, differences were ns by 12 months FU<br><br>No significant differences between intervention and control participants in FU service use at 4, 8, or 12 month FU (68% vs 69%, 69% vs 65%, and 72% vs 72%, respectively)<br><br>Significantly ( <i>p</i> <0.01) more intervention than control women reported dual protection use at 4 months (29% vs 14%) and 8 months (23% and 14%) FU; however, differences were ns by 12 months FU | High completion rate (91%)<br><br>Comparable study groups related to background characteristics<br>FU time ≥ 1 year<br><br><u>Weaknesses:</u><br>≤65% recruitment rate<br><br>Reliance on birth registry for individuals lost to FU limited information available<br><br>Recall bias<br><br>Blinding NR<br><br>Allocation procedures including concealment NR<br><br>May not represent general family planning clients (STI clinic sample) |
| Todres (1990) <sup>34</sup><br><br>Funding source not stated<br><br>Canada | Pre-post study; 1 study group<br><br>Planned Parenthood clinic, Toronto<br><br>FU=None | 62 females aged 14–35 (mean age=19); other characteristics NR<br><br>Recruitment: questionnaire given to participant                                                                                                                                                                                                           | Counseling delivered by public health staff versus nonpaid lay volunteers; details of counseling NR<br><br>Low intensity<br><br>Frequency: initial contact                                                                                                                                                                                                                                                                                                       | <u>Short-term:</u> increase knowledge                                                                                   | Overall, women had significantly ( <i>p</i> <.01) higher knowledge scores after counseling<br><br>Both types of counselors produced significant changes in knowledge levels (public                                                                                                                                                                                                                                                                                                                                                                                                                                                                                       | Level II-3; high risk for bias<br><br><u>Weaknesses:</u><br>Participation rate NR<br><br>Small sample<br><br>Characteristics of completers and noncompleters not examined                                                                                                                                                                                                                                                                  |

**Appendix**  
**Impact of Contraceptive Counseling in Clinical Settings: A Systematic Review**  
**Zapata et al.**

| Reference/<br>Funding                        | Design/Setting                                                                                           | Population                                                                                                                      | Intervention                                                                                                                                                                      | Outcomes                                                                                                                                                                                                               | Results                                                                                                                                                                                                                                                                         | Quality                                                                                                                                                    |
|----------------------------------------------|----------------------------------------------------------------------------------------------------------|---------------------------------------------------------------------------------------------------------------------------------|-----------------------------------------------------------------------------------------------------------------------------------------------------------------------------------|------------------------------------------------------------------------------------------------------------------------------------------------------------------------------------------------------------------------|---------------------------------------------------------------------------------------------------------------------------------------------------------------------------------------------------------------------------------------------------------------------------------|------------------------------------------------------------------------------------------------------------------------------------------------------------|
|                                              |                                                                                                          | with intake forms at admission                                                                                                  |                                                                                                                                                                                   |                                                                                                                                                                                                                        | health staff, $p<0.05$ and lay counselors, $p<0.20$ )                                                                                                                                                                                                                           | Validity of instrument questionable<br><br>Considered $p<0.20$ as statistically significant<br><br>No behavioral outcomes examined                         |
| Weisman (2002) <sup>35</sup>                 | Cross-sectional survey                                                                                   | 898 females aged 18–44; 83% white, NH, at risk for UIP; at risk for UIP group: mean age=33 years, 30% completed graduate school | Contraceptive counseling provided in the past 2 years by providers in managed care plans (HMO or POS); counseling evaluated on 3 dimensions—exposure, content and personalization | <u>Medium-term:</u> increase contraceptive use<br><br><u>Short-term:</u> Quality and satisfaction with service, increase intentions to use contraception, enhance other psychosocial determinants of contraceptive use | Among women at risk of UIP, receiving personalized counseling plus information was significantly ( $p<0.05$ ) associated with increased odds of current contraceptive use (AOR=4.97), and intentions to use contraception next year (AOR=2.74) vs those receiving no counseling | Level II-3; high risk for bias<br><br><u>Strengths:</u><br>-Analysis adjusted for confounding variables<br><br><u>Weaknesses:</u><br>≤65% recruitment rate |
| CDC, Association of Schools of Public Health | 16 county commercial provider network (nonprofit managed care company founded by University of Michigan) | Eligible: $n=1,406$<br>Recruitment: random sample selected from provider network enrollees                                      | Intensity: NR<br><br>Frequency: NR                                                                                                                                                |                                                                                                                                                                                                                        | Among all women, receiving personalized counseling plus information was significantly ( $p<0.05$ ) associated with increased odds of satisfaction (AOR=3.07) vs those receiving no counseling; it was not significantly associated with self-efficacy to prevent UIP            | Recall bias<br><br>Validity of instrument questionable<br><br>Cross-sectional design means causal claims about impact of counseling cannot be made         |
| U.S.                                         | FU: None                                                                                                 |                                                                                                                                 |                                                                                                                                                                                   |                                                                                                                                                                                                                        |                                                                                                                                                                                                                                                                                 |                                                                                                                                                            |
| Yassin (2005) <sup>37</sup>                  | Cross-sectional survey; 2 study groups                                                                   | 100 females aged 15–41 (median age=26) received counseling; compared with 422 control group                                     | Dedicated and targeted pretermination of pregnancy contraceptive counseling provided by experienced family planning nurses; included full and detailed                            | <u>Medium-term:</u> increase contraceptive use, increase use of more effective methods                                                                                                                                 | More women in intervention group used some contraceptive method postabortion (96%) than control group (40%); tests of significance not conducted                                                                                                                                | Level II-3; high risk for bias<br><br><u>Strengths:</u><br>High participation and completion rates (100%)                                                  |
| Ford, W.T. Grant, and                        |                                                                                                          |                                                                                                                                 |                                                                                                                                                                                   |                                                                                                                                                                                                                        |                                                                                                                                                                                                                                                                                 |                                                                                                                                                            |

**Appendix**  
**Impact of Contraceptive Counseling in Clinical Settings: A Systematic Review**  
**Zapata et al.**

| Reference/<br>Funding                           | Design/Setting                                              | Population                                                                                                                                                                  | Intervention                                                                                                                                                                                                                                                                                                                                                   | Outcomes | Results                                                                                                                                                                             | Quality                                                                                                                                                                                                                                                                                                                                                                                                                                |
|-------------------------------------------------|-------------------------------------------------------------|-----------------------------------------------------------------------------------------------------------------------------------------------------------------------------|----------------------------------------------------------------------------------------------------------------------------------------------------------------------------------------------------------------------------------------------------------------------------------------------------------------------------------------------------------------|----------|-------------------------------------------------------------------------------------------------------------------------------------------------------------------------------------|----------------------------------------------------------------------------------------------------------------------------------------------------------------------------------------------------------------------------------------------------------------------------------------------------------------------------------------------------------------------------------------------------------------------------------------|
| Hewlett<br>Foundations<br><br>United<br>Kingdom | Surgical abortion<br>clinic, Burnley,<br>U.K.<br><br>FU: NR | women who<br>received no<br>counseling<br><br>Completed<br>assessment: 100<br><br>Recruitment:<br>participants self-<br>selected through<br>requesting abortion<br>services | discussion of all methods of<br>contraception, informational<br>literature, opportunity to<br>choose a method based on<br>discussion and literature,<br>administration of chosen<br>method at time of abortion or<br>immediately postabortion;<br>non-user-dependent methods<br>were emphasized.<br><br>Low intensity<br><br>Frequency: single<br>intervention |          | More women in intervention<br>group used effective<br>methods postabortion than<br>control group (implant: 11%<br>vs 0%, IUD: 47% vs 0%);<br>tests of significance not<br>conducted | <u>Weaknesses:</u><br><br>Cross-sectional design means<br>causal claims about impact of<br>counseling cannot be made<br><br>Comparability of groups related<br>to background characteristics<br>unknown (not reported for the<br>comparison group)<br><br>Selection bias<br><br>Confounding possible<br><br>No tests of significance<br>conducted<br><br>May not represent general<br>family planning clients<br>(postabortion sample) |

*Note:* Intensity of intervention defined as low (intervention took place during a single visit), moderate (intervention took place during more than one visit, but less than weekly), or high (intervention took place weekly).

AVG, average; COC, combined oral contraceptive pill; CT, prospective nonrandomized controlled trial; EC, emergency contraception; FP, family planning; FU, follow-up; HS, high school; IUD, intrauterine device; IUS, intrauterine system; LARC, long-acting reversible contraception (intrauterine device or implant); NICHD, National Institute on Child Health and Human Development; NR, not reported; NS, not significant; NYC, New York City; NH, non-Hispanic; NR, not reported; NS, not significant; OC, oral contraceptive; PCP, primary care provider; PI, principle investigation; POP, progestin only pill; RH, reproductive health; SOC, standard of care; STI, sexually transmitted infection; UIP, unintended pregnancy
